# Supplementary material for: Tuning anisotropic electronic transport properties of phosphorene via substitutional doping
Source: Royal Society of Chemistry journal article supplement (doi:10.1039/c6cp04508a), 2016-01-01
Supplement: c6cp04508a1.pdf [file c6cp04508a1.pdf]

### Supplementary Information

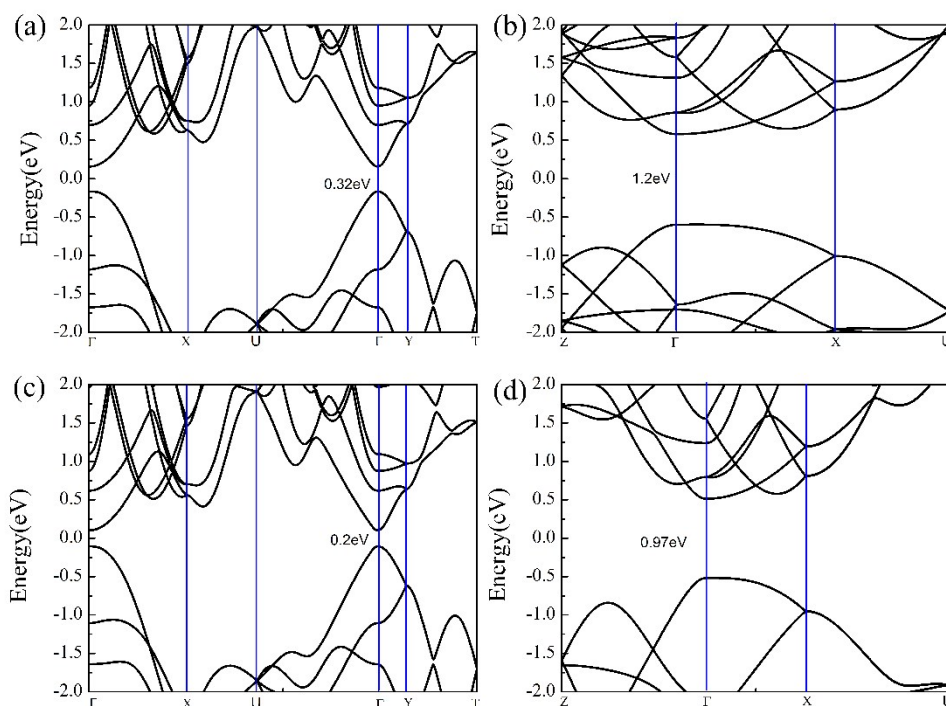

Fig.S1. calculated band structure of (a) bulk phosphorus by using MGGA, (b) single layer of bulk black phosphorene by using MGGA, (c) bulk phosphorus by using PBE and (d) single layer of bulk black phosphorene by using PBE. The Fermi-energy is set to 0 eV.

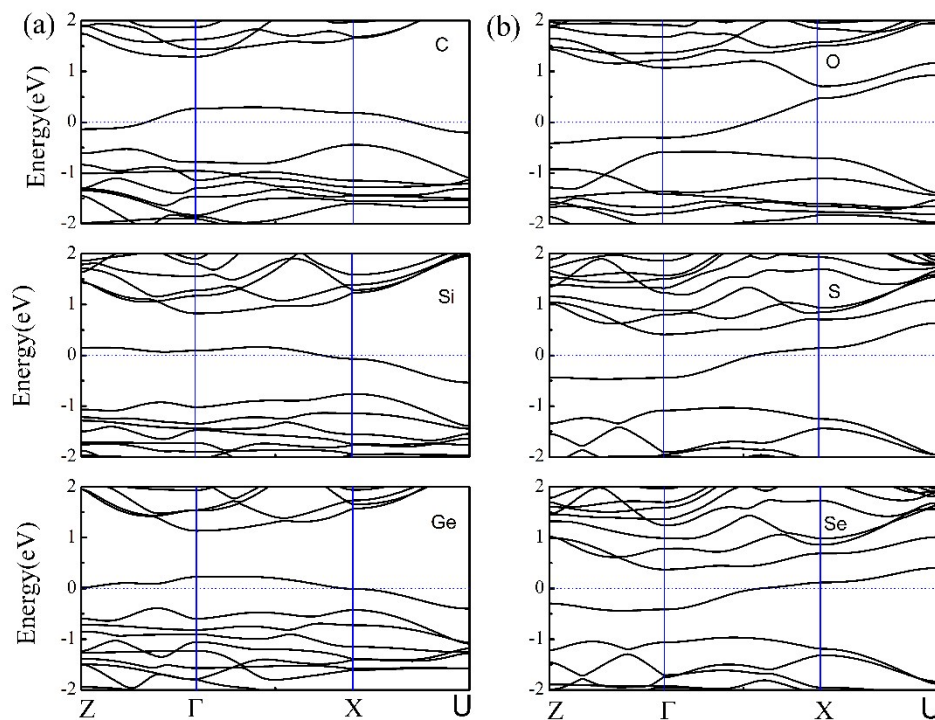

Fig.S2. Calculated band structure of doped phosphorene with (a) group IV and (b) group VI atoms, respectively.

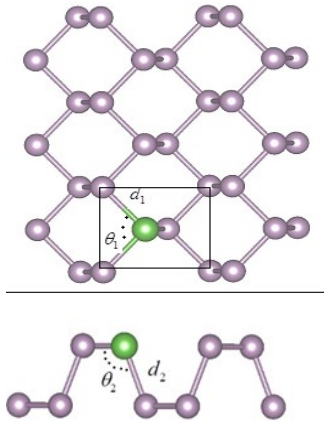

Figure S3: The schematic of phosphorene, (a) top view and (b) side view. The P tom substituted by a dopant atom is drawn with a dark circle. The bond lengths ( $d_1$  and  $d_2$ ) and bond angles ( $\theta_1$  and  $\theta_2$ ) are represented in Table S1.

Table S1: Calculated bond lengths ( $d_1$  and  $d_2$ ) and bond angles ( $\theta_1$  and  $\theta_2$ ) for  $2 \times 2$  supercell of group III to group VI elements doped phosphorene, respectively. Together with those of pure phosphorene, For comparison, previous theoretical results for pure phosphorene are also given.

| Dopant atom       | $d_1(\text{Å})$ | $d_2(\text{Å})$ | $\theta_1(^{\circ})$ | $\theta_2(^{\circ})$ |
|-------------------|-----------------|-----------------|----------------------|----------------------|
| Pure <sup>1</sup> | 2.25            | 2.26            | 96.9                 | 102.3                |
| pure              | 2.24163         | 2.26386         | 94.9955              | 103.1664             |
| B                 | 1.96005         | 1.87783         | 109.0278             | 122.9979             |
| C                 | 1.81992         | 1.80525         | 106.5523             | 121.8137             |
| N                 | 1.81247         | 1.82556         | 103.1496             | 119.7765             |
| O                 | 2.12179         | 1.80211         | 108.5768             | 118.5664             |
| Al                | 2.35352         | 2.35096         | 91.9347              | 116.3683             |
| Si                | 2.28013         | 2.29639         | 93.2899              | 108.8055             |
| S                 | 2.3477          | 2.31801         | 106.9744             | 113.1779             |
| Ga                | 2.3228          | 2.32569         | 96.8235              | 120.3359             |
| Ge                | 2.37262         | 2.41392         | 90.6851              | 103.266              |
| As                | 2.36114         | 2.39683         | 92.3333              | 99.3                 |
| Se                | 2.48781         | 2.51966         | 104.1866             | 108.4787             |

Table S2: calculated lattice constants for supercell of group III to group VI elements doped phosphorene, respectively, together with those of pristine phosphorene.

| Dopant atom | a (Å)   | b(Å)    | c(Å)    |
|-------------|---------|---------|---------|
| pristine    | 6.6272  | 11.3115 | 8.86485 |
| B           | 6.60009 | 11.3082 | 8.87517 |

|    |         |         |         |
|----|---------|---------|---------|
| Al | 6.74929 | 11.3652 | 8.44615 |
| Ga | 6.75325 | 11.362  | 8.46652 |
| C  | 6.5919  | 11.3266 | 8.78562 |
| Si | 6.7198  | 11.4083 | 8.37851 |
| Ge | 6.76508 | 11.376  | 8.45446 |
| N  | 6.5061  | 11.3295 | 8.76784 |
| As | 6.67666 | 11.291  | 8.87567 |
| O  | 6.5499  | 11.374  | 8.7404  |
| S  | 6.217   | 11.2997 | 8.91053 |
| Se | 6.67938 | 11.269  | 8.99964 |

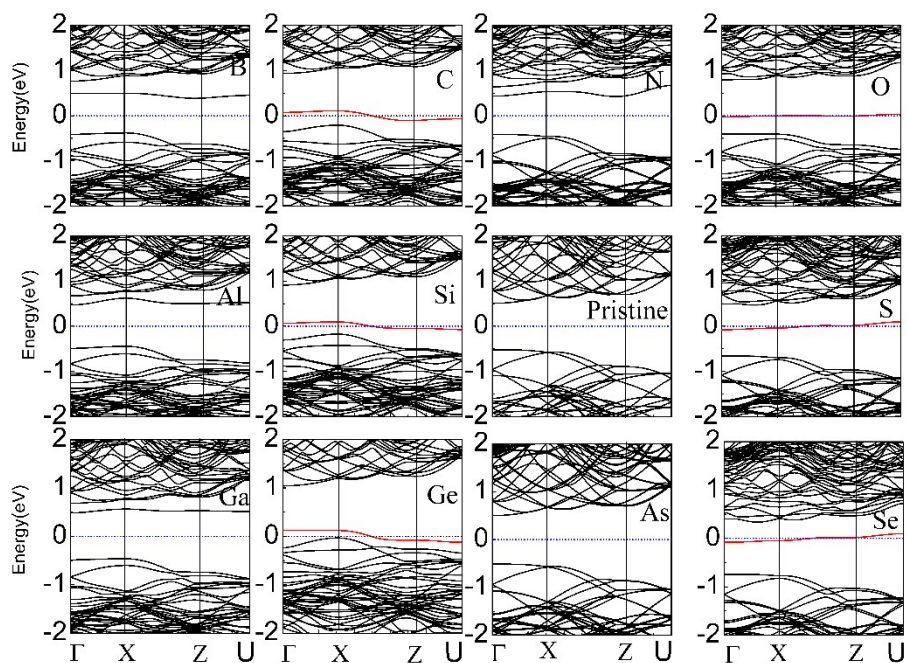

Figure S4. Calculated band structures for 4×4 supercell pristine phosphorene and doped with B, C, N, O, Al, Si, S, Ga, Ge, As, Se atoms, respectively. The energy zero represents the Fermi level.
